# Supplementary material
Source: HighWire-hosted journal article supplement (https://bmjopen.bmj.com/content/8/7/e020600)
Supplement: inline-supplementary-material-2 [file inline-supplementary-material-2.pdf]

Table S1. Estimates of the effects associated with a network member's mood score in the mixed-effects models using diary data during April-October 2015.

| Variables                                 | Value   | Std. Error | t-value | p-value |
|-------------------------------------------|---------|------------|---------|---------|
| Male [female]                             | -0.0090 | 0.0045     | -1.9745 | 0.0484  |
| <i>Acquaintanceship with diary keeper</i> |         |            |         |         |
| Knew well                                 | 0.0115  | 0.0057     | 2.0085  | 0.0446  |
| [Knew, not well]                          |         |            |         |         |
| <i>Relationship with diary keeper</i>     |         |            |         |         |
| Family member/relative                    | 0.0017  | 0.0080     | 0.2094  | 0.8342  |
| Good friend                               | 0.0048  | 0.0091     | 0.5229  | 0.6011  |
| Coworker/trade partner                    | -0.0005 | 0.0078     | -0.0580 | 0.9538  |
| Schoolmate/teacher/student                |         |            |         |         |
| [Other]                                   | 0.0057  | 0.0078     | 0.7335  | 0.4633  |
| <i>Contact mode (%)</i>                   |         |            |         |         |
| Face-to-face                              | 0.0353  | 0.0083     | 4.2326  | 0.0000  |
| Voice only                                | 0.0212  | 0.0132     | 1.6103  | 0.1074  |
| [Text only]                               |         |            |         |         |
| <i>Contact purpose (%)</i>                |         |            |         |         |
| Work/school                               | -0.0265 | 0.0074     | -3.5783 | 0.0003  |
| Daily routine                             | -0.0499 | 0.0107     | -4.6710 | 0.0000  |
| [Other]                                   |         |            |         |         |
| <i>Contact duration (%)</i>               |         |            |         |         |
| [Less than 5 minutes]                     |         |            |         |         |
| 5-59 minutes                              | 0.0093  | 0.0077     | 1.2072  | 0.2274  |
| 1-4 hours                                 | 0.0309  | 0.0094     | 3.2984  | 0.0010  |
| 4 or more hours                           | 0.0359  | 0.0132     | 2.7261  | 0.0064  |
| Average mood of diary keeper              | 0.6667  | 0.0074     | 89.9680 | 0.0000  |
| <i>Average mood of network neighbors</i>  |         |            |         |         |
| One degree of separation                  | 0.2180  | 0.0155     | 14.0250 | 0.0000  |
| Two degrees of separation                 | 0.1156  | 0.0195     | 5.9321  | 0.0000  |
| All others                                | -0.0295 | 0.0164     | -1.7921 | 0.0732  |

Note: Those listed in brackets are the base categories of the models.
