# Supplementary material
Source: HighWire-hosted journal article supplement (https://bmjopen.bmj.com/content/8/7/e020600)
Supplement: inline-supplementary-material-5 [file inline-supplementary-material-5.pdf]

Figure S2. The interface of contact diary

**我的日記**

- Health diary ☒ 點選健康日記
- Contact diary ☒ 點選接觸日記
- Feedback ☒ 我的記錄圖
- Account ☒ 帳號資訊
- Profile info. ☒ 個人資料
- Contact list ☒ 接觸名單
- Instruction ☒ 使用說明
- Other questionnaires ☒ 其他計畫連結
- Logout ☒ 登出

**Rank of scores**

- Today ☒ 今日排行
- This week ☒ 本週排行
- This month ☒ 本月排行
- Number of contacted persons ☒ 人脈排行
- Summary of the personal ranking ☒ 個人點數

### My contact diary

**Person you have contacted before**

請選擇：  
☒ 曾經填寫過的接觸對象  
☐ 新增接觸對象

※系統自動隱藏前一小時間內填寫過的接觸名單  
 【方式二】快速搜尋

這次接觸以前，您和他熟悉程度？

☐ 認識很熟    ☐ 認識但不熟    ☐ 不認識

您可能和他討論重要的事情嗎？

☐ 非常可能    ☐ 可能    ☐ 不可能    ☐ 非常不可能

開始點選本次接觸

1. 溫棒枝和下列顯示的人彼此之間熟不熟？  
 (這次填寫前從未確認熟悉程度的人數有 0 人)

| 溫棒枝可能認識的人 | 熟悉程度                                                                             |
|-----------|----------------------------------------------------------------------------------|
| 鄧市鎮       | <input type="radio"/> 認識很熟 <input type="radio"/> 認識但不熟 <input type="radio"/> 不認識 |

**Add new contacted person**

Quick search the name of contacted person

The familiarity with the contacted person before this contact

How likely you will discuss important matters with him/her ?

☐ 非常可能    ☐ 可能    ☐ 不可能    ☐ 非常不可能

Please confirm the familiarity between the contacted person and five sampled alters from my contacted list

When does this contact occur during the day?

2. 本次主要接觸時段？

☐ 上午    ☐ 中午    ☐ 下午    ☐ 晚上    ☐ 凌晨

Who initiates this contact?

3. 是誰主動接觸？

☐ 自己    ☐ 對方    ☐ 共同    ☐ 其他

How did you contact? (i.e. face-to-face physical contact, face-to-face non-physical contact, by text, by voice)

4. 本次主要接觸方式？

☐ 面對面 (有身體的接觸，如說)    ☐ 面對面 (沒有身體的接觸)    ☐ 語音通話 (包含語音留言)  
☐ 只有文字 (包含簡訊、e-mail、Line)

Where did you contact? (i.e. home, your school or working place, public place, or other places)

5. 接觸的時候您在哪裡？

☐ 現住所 (包括宿舍)    ☐ 我的工作場所/學校  
☐ 公共場所    ☐ 其他 (如：對方的住所/工作場所/學校)

Where does your contacted person locate? (i.e. northern, central, southern, eastern Taiwan, other places, or unknown)

6. 本次接觸的時候，對方在哪裡？

☐ 北部    ☐ 中部    ☐ 南部    ☐ 東部  
☐ 其他地區    ☐ 不知道

How long did this contact last? (i.e. <1 minutes, 1-4 minutes, 5-14 minutes, 15-59 minutes, 1-4 hours, >4 hours)

7. 接觸時間？

☐ 少於1分鐘    ☐ 1-4分    ☐ 5-14分    ☐ 15-59分  
☐ 1-4小時    ☐ 大於4小時

What is the main purpose of this contact? (school work/work, leisure activities, medical visits, transportation, social and gossip, daily routine, and others)

8. 主要接觸內容？

☐ 課業/工作    ☐ 休閒活動    ☐ 就醫    ☐ 通勤  
☐ 社交與聊天    ☐ 日常作息/家務    ☐ 其他

How much do you feel the contact benefitted you? (note: the gain was not related to the emotion)

9. 接觸過程中，您覺得收穫大不大? (\*註:與心情/情緒無關的具體收穫)

☐ 很大      ☐ 有一點      ☐ 幾乎沒有      ☐ 有損失或額外付出

What is your mood during the contact ?

10. 本次接觸的時候，您的心情好壞?

☐ 非常好      ☐ 很好      ☐ 還好      ☐ 不好

What is your contacted person's mood during the contact ?

11. 對方的整體心情好不好?

☐ 非常好      ☐ 很好      ☐ 還好      ☐ 不好  
☐ 不知道

Does the contacted person have the symptoms of the flu ?

12. 對方是否有以下症狀?

☐ 沒有感冒症狀    ☐ 可能有感冒    ☐ 確定有感冒    ☐ 可能有登革熱

儲存
