# Supplementary material
Source: HighWire-hosted journal article supplement (https://bmjopen.bmj.com/content/8/7/e020600)

Figure S3. Contact tree: summary chart of contacted persons for a participant

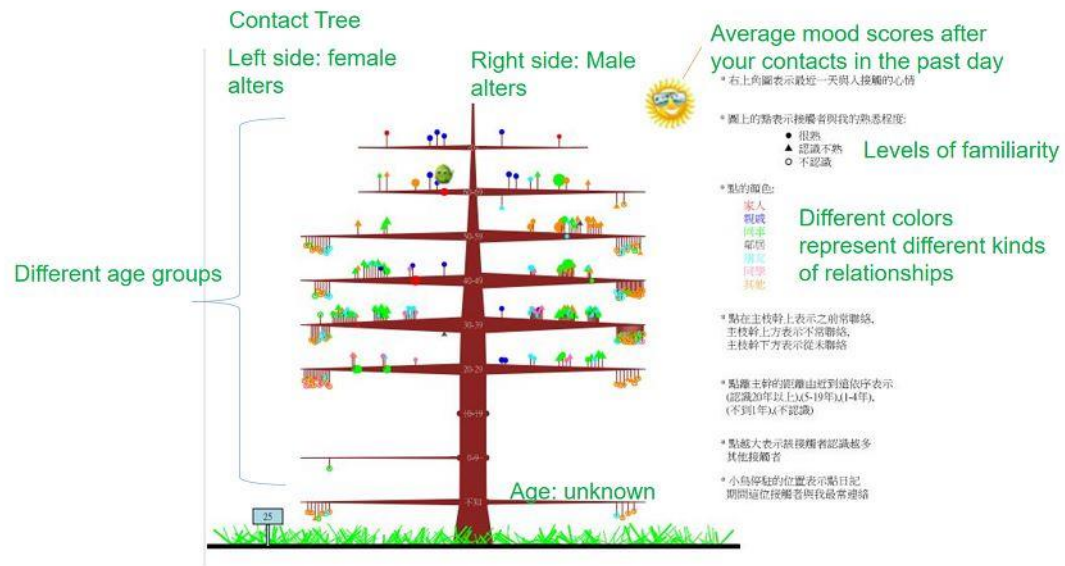

Supplement: inline-supplementary-material-1 [file inline-supplementary-material-1.pdf]

Figure S1. Homepage of the ClickDiary platform

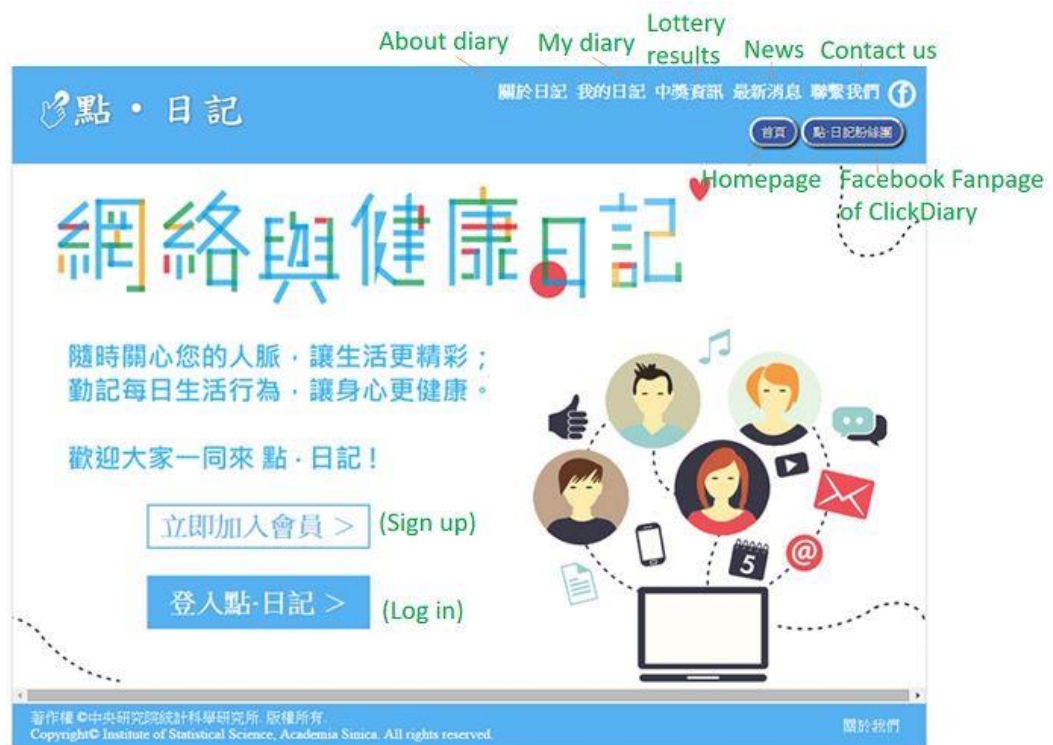

Supplement: inline-supplementary-material-4 [file inline-supplementary-material-4.pdf]
